# Supplementary material for: Allele-Specific Transcriptome and Methylome Analysis Reveals Stable Inheritance and Cis-Regulation of DNA Methylation in Nasonia
Source: PubMed Central journal article supplement (PMC4933354; doi:10.1371/journal.pbio.1002500), 2016-07-05
Supplement: pbio.1002500.s001.pdf [file pbio.1002500.s001.pdf]

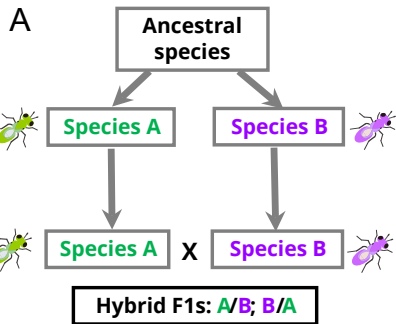

- B**
- SA expression level in A
  - SB expression level in B
  - aA A allele exp. % in F1s
  - aB B allele exp. % in F1s
- Parental-F1 correlation

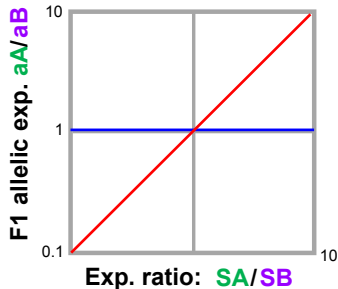

**C** cis-regulatory divergence

Exp. ratio  $SA : SB$

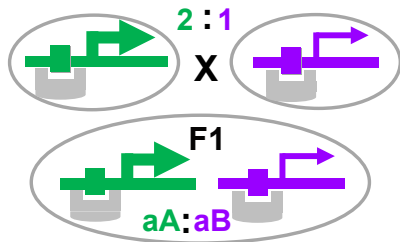

Allelic ratio  $2:1$

**D** trans-regulatory divergence

Exp. ratio  $SA : SB$

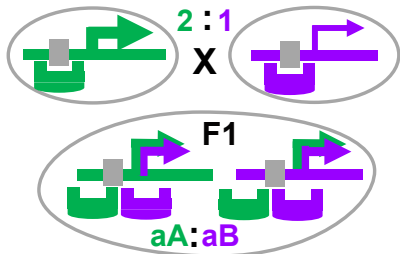

Allelic ratio  $1:1$
