# Supplementary material for: Allele-Specific Transcriptome and Methylome Analysis Reveals Stable Inheritance and Cis-Regulation of DNA Methylation in Nasonia
Source: PubMed Central journal article supplement (PMC4933354; doi:10.1371/journal.pbio.1002500), 2016-07-05

F<sub>1</sub>GV expression level: log<sub>2</sub>(FPKM)

$\rho = 0.987$

Significantly differentially expressed genes  
( $q$ -value < 0.05, N=12)

F<sub>1</sub>VG expression level: log<sub>2</sub>(FPKM)

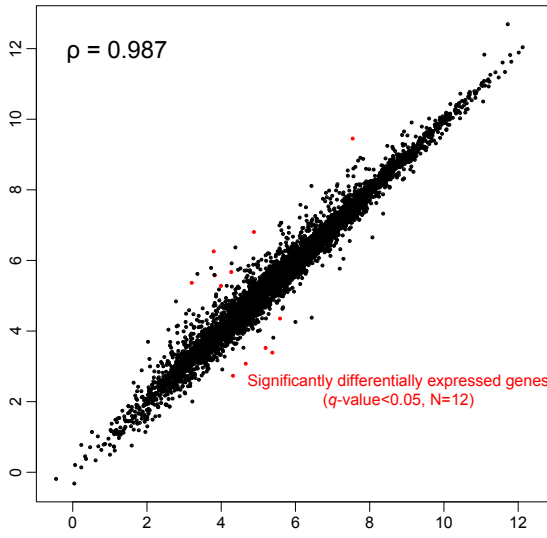

Supplement: pbio.1002500.s002.pdf [file pbio.1002500.s002.pdf]
