# Supplementary material for: Allele-Specific Transcriptome and Methylome Analysis Reveals Stable Inheritance and Cis-Regulation of DNA Methylation in Nasonia
Source: PubMed Central journal article supplement (PMC4933354; doi:10.1371/journal.pbio.1002500), 2016-07-05

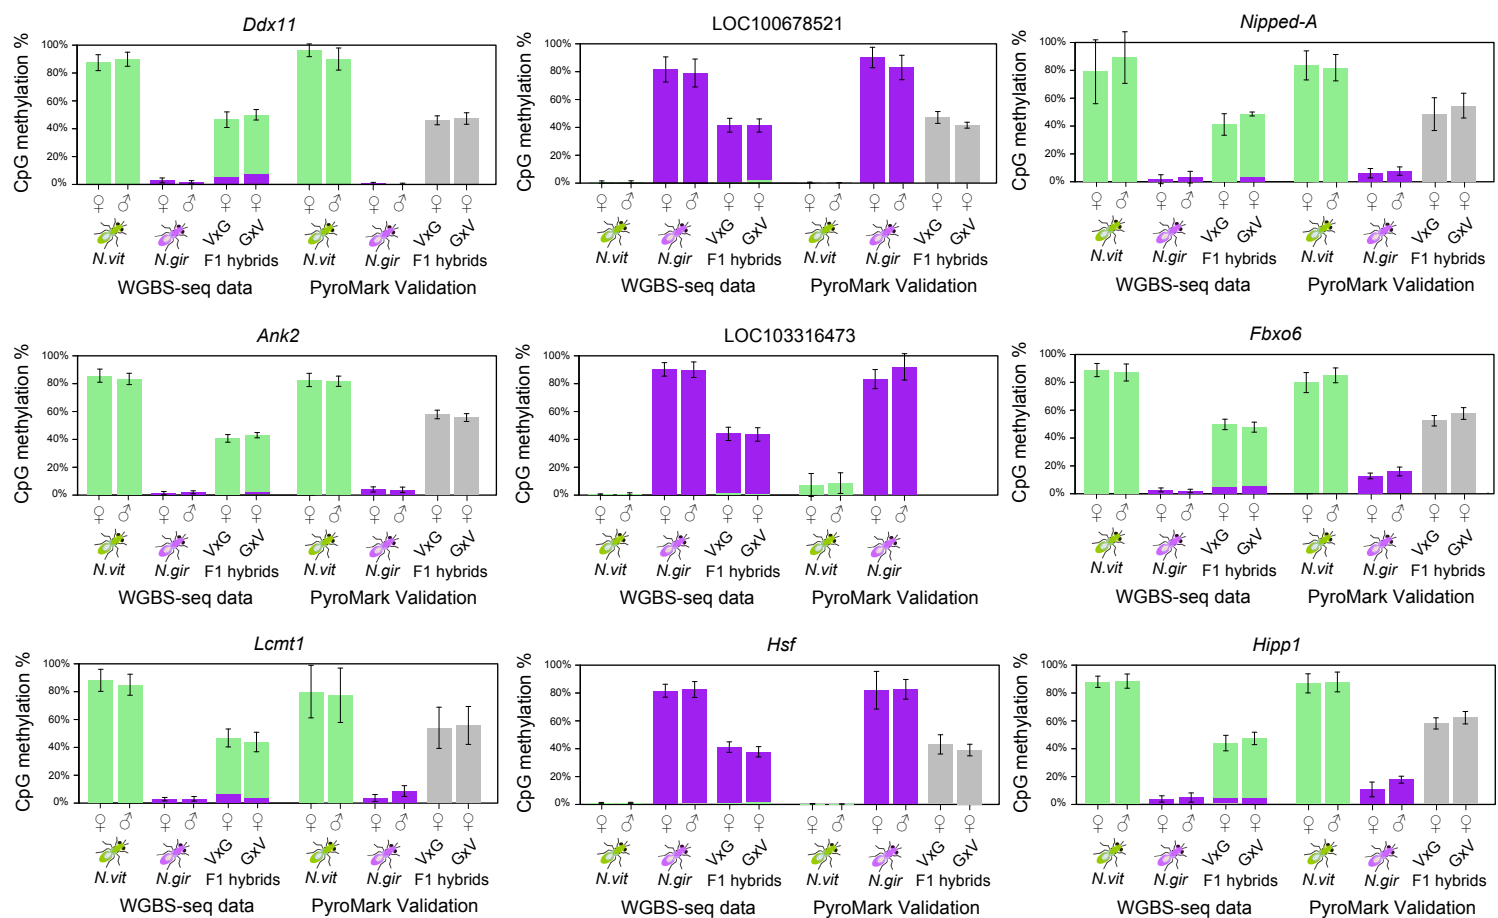

Supplement: pbio.1002500.s004.pdf [file pbio.1002500.s004.pdf]
