# Supplementary material for: Allele-Specific Transcriptome and Methylome Analysis Reveals Stable Inheritance and Cis-Regulation of DNA Methylation in Nasonia
Source: PubMed Central journal article supplement (PMC4933354; doi:10.1371/journal.pbio.1002500), 2016-07-05
Supplement: pbio.1002500.s007.pdf [file pbio.1002500.s007.pdf]

| OGS2_gene_id   | Highly expressed species | log2FC | FDR       | # of SNPs | ASE in F1VG | ASE in F1GV | Gene Annotation                                |
|----------------|--------------------------|--------|-----------|-----------|-------------|-------------|------------------------------------------------|
| Nasvi2EG018425 | Ng                       | 8.48   | 1.53E-53  | 3         | 0.00%       | 0.00%       | Mitogen-activated protein kinase kinase kinase |
| Nasvi2EG003931 | Ng                       | 7.93   | 9.98E-80  | 2         | 0.00%       | 0.00%       | harbinger transposase-derived nuclease         |
| Nasvi2EG035843 | Ng                       | 7.53   | 1.20E-62  | 6         | 0.00%       | 0.00%       | Unknown                                        |
| Nasvi2EG016630 | Ng                       | 7.05   | 3.67E-53  | 5         | 1.88%       | 1.31%       | hypothetical protein LOC100115888              |
| Nasvi2EG005783 | Ng                       | 6.86   | 4.74E-38  | 2         | 1.96%       | 1.06%       | venom allergen 3-like                          |
| Nasvi2EG010088 | Ng                       | 5.86   | 8.68E-58  | 6         | 2.45%       | 1.21%       | Unknown                                        |
| Nasvi2EG035729 | Ng                       | 5.68   | 9.68E-56  | 7         | 0.50%       | 0.96%       | hypothetical protein LOC100117229              |
| Nasvi2EG007682 | Ng                       | 5.51   | 3.02E-42  | 4         | 0.49%       | 0.00%       | NADPH oxidase 5 like                           |
| Nasvi2EG000359 | Ng                       | 4.09   | 7.37E-18  | 2         | 8.41%       | 2.99%       | chymotrypsin inhibitor-like                    |
| Nasvi2EG006005 | Ng                       | 4.04   | 3.08E-19  | 2         | 2.11%       | 3.40%       | hypothetical protein LOC100678626              |
| Nasvi2EG013889 | Ng                       | 2.37   | 9.09E-08  | 2         | 2.54%       | 0.00%       | dynein heavy chain axonemal                    |
| Nasvi2EG017034 | Nv                       | -1.37  | 0.0116    | 2         | 100.00%     | 100.00%     | hypothetical protein LOC100679343              |
| Nasvi2EG012837 | Nv                       | -1.52  | 5.31E-06  | 2         | 96.68%      | 90.83%      | Membrane metallo-endopeptidase 1               |
| Nasvi2EG002495 | Nv                       | -1.65  | 4.55E-07  | 5         | 98.49%      | 96.15%      | mrna-capping enzyme-like                       |
| Nasvi2EG005683 | Nv                       | -1.77  | 0.0006549 | 2         | 86.99%      | 86.60%      | hypothetical protein LOC100678580              |
| Nasvi2EG016161 | Nv                       | -1.81  | 0.0001347 | 4         | 86.91%      | 85.78%      | peptidoglycan recognition protein              |
| Nasvi2EG012813 | Nv                       | -2.03  | 0.0172134 | 4         | 96.93%      | 100.00%     | Unknown                                        |
| Nasvi2EG002983 | Nv                       | -2.46  | 8.80E-16  | 4         | 93.73%      | 92.51%      | hypothetical protein LOC100115681              |
| Nasvi2EG004029 | Nv                       | -2.46  | 9.58E-15  | 5         | 99.12%      | 100.00%     | inducible metalloproteinase inhibitor protein  |
| Nasvi2EG012455 | Nv                       | -2.66  | 5.35E-17  | 8         | 100.00%     | 97.50%      | hypothetical protein LOC100116143              |
| Nasvi2EG012057 | Nv                       | -2.70  | 1.53E-19  | 4         | 100.00%     | 96.68%      | Cytochrome P450 4C1                            |
| Nasvi2EG025693 | Nv                       | -2.84  | 1.72E-17  | 2         | 96.84%      | 97.16%      | fatty acyl- reductase cg5065-like              |
| Nasvi2EG006972 | Nv                       | -2.87  | 3.60E-07  | 2         | 89.24%      | 100.00%     | cytochrome p450 6k1-like                       |
| Nasvi2EG006109 | Nv                       | -2.90  | 3.19E-10  | 5         | 97.79%      | 94.95%      | Circadian clock-controlled protein             |
| Nasvi2EG011550 | Nv                       | -2.91  | 1.93E-18  | 2         | 100.00%     | 100.00%     | hypothetical protein LOC100115668              |
| Nasvi2EG008427 | Nv                       | -3.01  | 5.10E-06  | 7         | 100.00%     | 100.00%     | hypothetical protein LOC100679125              |
| Nasvi2EG012869 | Nv                       | -3.04  | 1.72E-09  | 4         | 100.00%     | 100.00%     | nvu1 - fruitless readthrough protein precursor |
| Nasvi2EG000282 | Nv                       | -3.06  | 0.0004    | 4         | 100.00%     | 98.76%      | hypothetical protein LOC100113975              |
| Nasvi2EG005530 | Nv                       | -3.21  | 1.39E-31  | 6         | 98.78%      | 98.61%      | neurotrimin                                    |
| Nasvi2EG012405 | Nv                       | -3.22  | 2.57E-12  | 8         | 96.88%      | 94.14%      | hypothetical protein LOC100115754              |
| Nasvi2EG016464 | Nv                       | -3.27  | 4.22E-08  | 2         | 100.00%     | 100.00%     | yellow protein                                 |
| Nasvi2EG016108 | Nv                       | -3.51  | 2.68E-11  | 2         | 91.01%      | 96.76%      | carboxylesterase clade member 4                |
| Nasvi2EG004072 | Nv                       | -3.53  | 1.47E-13  | 4         | 95.29%      | 100.00%     | double-stranded rna-specific editase adar      |

| OGS2_gene_id   | Highly expressed species | log2FC | FDR       | # of SNPs | ASE in F1VG | ASE in F1GV | Gene Annotation                                             |
|----------------|--------------------------|--------|-----------|-----------|-------------|-------------|-------------------------------------------------------------|
| Nasvi2EG002674 | Nv                       | -3.60  | 4.15E-11  | 2         | 100.00%     | 100.00%     | hypothetical protein LOC100679403                           |
| Nasvi2EG008530 | Nv                       | -3.85  | 2.67E-18  | 2         | 100.00%     | 100.00%     | neutral alpha-glucosidase ab-like                           |
| Nasvi2EG013292 | Nv                       | -4.01  | 1.83E-14  | 2         | 100.00%     | 100.00%     | hypothetical protein LOC100680390                           |
| Nasvi2EG008723 | Nv                       | -4.25  | 5.67E-12  | 6         | 100.00%     | 100.00%     | hypothetical protein LOC100678275                           |
| Nasvi2EG005827 | Nv                       | -4.60  | 2.93E-18  | 5         | 100.00%     | 100.00%     | odorant binding protein 32                                  |
| Nasvi2EG017109 | Nv                       | -4.73  | 3.04E-45  | 6         | 100.00%     | 100.00%     | F-box only protein 6 like                                   |
| Nasvi2EG019092 | Nv                       | -4.79  | 7.78E-07  | 3         | 100.00%     | 100.00%     | venom protein m precursor                                   |
| Nasvi2EG010974 | Nv                       | -4.92  | 9.43E-14  | 9         | 98.10%      | 99.65%      | hypothetical protein LOC100118583                           |
| Nasvi2EG027375 | Nv                       | -5.25  | 1.52E-62  | 3         | 99.69%      | 100.00%     | hypothetical protein LOC100678738                           |
| Nasvi2EG008724 | Nv                       | -5.58  | 8.72E-28  | 4         | 100.00%     | 100.00%     | hypothetical protein LOC100678392                           |
| Nasvi2EG017698 | Nv                       | -5.63  | 1.83E-29  | 3         | 100.00%     | 100.00%     | laccase-1                                                   |
| Nasvi2EG027001 | Nv                       | -5.71  | 1.69E-33  | 2         | 100.00%     | 100.00%     | hypothetical protein LOC100679921                           |
| Nasvi2EG009774 | Nv                       | -5.93  | 1.20E-21  | 10        | 100.00%     | 100.00%     | tpr domain-containing protein                               |
| Nasvi2EG002048 | Nv                       | -6.09  | 1.92E-32  | 3         | 100.00%     | 100.00%     | Unknown                                                     |
| Nasvi2EG007568 | Nv                       | -6.34  | 1.98E-33  | 17        | 100.00%     | 100.00%     | venom carboxylesterase-6                                    |
| Nasvi2EG026476 | Nv                       | -6.53  | 4.78E-53  | 3         | 100.00%     | 100.00%     | dna pol b2 domain-containing protein                        |
| Nasvi2EG025043 | Nv                       | -6.57  | 9.43E-44  | 3         | 100.00%     | 100.00%     | hypothetical protein LOC100679011                           |
| Nasvi2EG021197 | Nv                       | -6.77  | 1.39E-29  | 6         | 100.00%     | 100.00%     | hypothetical protein LOC100680435                           |
| Nasvi2EG025958 | Nv                       | -6.84  | 2.55E-50  | 2         | 100.00%     | 100.00%     | hypothetical protein LOC100678973                           |
| Nasvi2EG031633 | Nv                       | -7.44  | 7.53E-70  | 3         | 100.00%     | 100.00%     | nuclease harbi1-like                                        |
| Nasvi2EG034284 | Nv                       | -8.11  | 1.10E-40  | 3         | 100.00%     | 100.00%     | hypothetical protein LOC100678554                           |
| Nasvi2EG028731 | Nv                       | -8.17  | 1.30E-48  | 4         | 100.00%     | 100.00%     | TE:Endonuclease/Reverse transcriptase                       |
| Nasvi2EG025046 | Nv                       | -8.19  | 4.41E-65  | 2         | 100.00%     | 100.00%     | nibrin-like                                                 |
| Nasvi2EG013151 | Nv                       | -8.20  | 6.20E-50  | 4         | 100.00%     | 100.00%     | hypothetical protein LOC100679253                           |
| Nasvi2EG004200 | Nv                       | -9.25  | 2.84E-71  | 6         | 100.00%     | 100.00%     | serine threonine-protein phosphatase 6 regulatory subunit   |
| Nasvi2EG025044 | Nv                       | -9.57  | 6.64E-77  | 2         | 100.00%     | 100.00%     | probable e3 ubiquitin-protein ligase trip12-like            |
| Nasvi2EG016883 | Nv                       | -9.77  | 1.97E-96  | 2         | 100.00%     | 100.00%     | hypothetical protein LOC100115309                           |
| Nasvi2EG018142 | Nv                       | -11.01 | 2.62E-119 | 4         | 100.00%     | 100.00%     | retrovirus-related pol polyprotein from transposon tnt 1-94 |
